# Supplementary material for: Early Exposure to Traffic-Related Air Pollution, Respiratory Symptoms at 4 Years of Age, and Potential Effect Modification by Parental Allergy, Stressful Family Events, and Sex: A Prospective Follow-up Study of the PARIS Birth Cohort
Source: PubMed Central journal article supplement (PMC5381976; doi:10.1289/ehp239), 2016-05-24
Supplement: EHP239.s001.acco.pdf [file EHP239.s001.acco.pdf]

**Note to readers with disabilities:** *EHP* strives to ensure that all journal content is accessible to all readers. However, some figures and Supplemental Material published in *EHP* articles may not conform to [508 standards](#) due to the complexity of the information being presented. If you need assistance accessing journal content, please contact [ehp508@niehs.nih.gov](mailto:ehp508@niehs.nih.gov). Our staff will work with you to assess and meet your accessibility needs within 3 working days.

## **Supplemental Material**

### **Early Exposure to Traffic-Related Air Pollution, Respiratory Symptoms at 4 Years of Age, and Potential Effect Modification by Parental Allergy, Stressful Family Events, and Sex: A Prospective Follow-up Study of the PARIS Birth Cohort**

Fanny Rancière, Nicolas Bougas, Malika Viola, and Isabelle Momas

#### **Table of Contents**

**Figure S1:** Directed acyclic graph for estimating the direct effect of early traffic-related air pollution exposure on respiratory health up to 4 years.

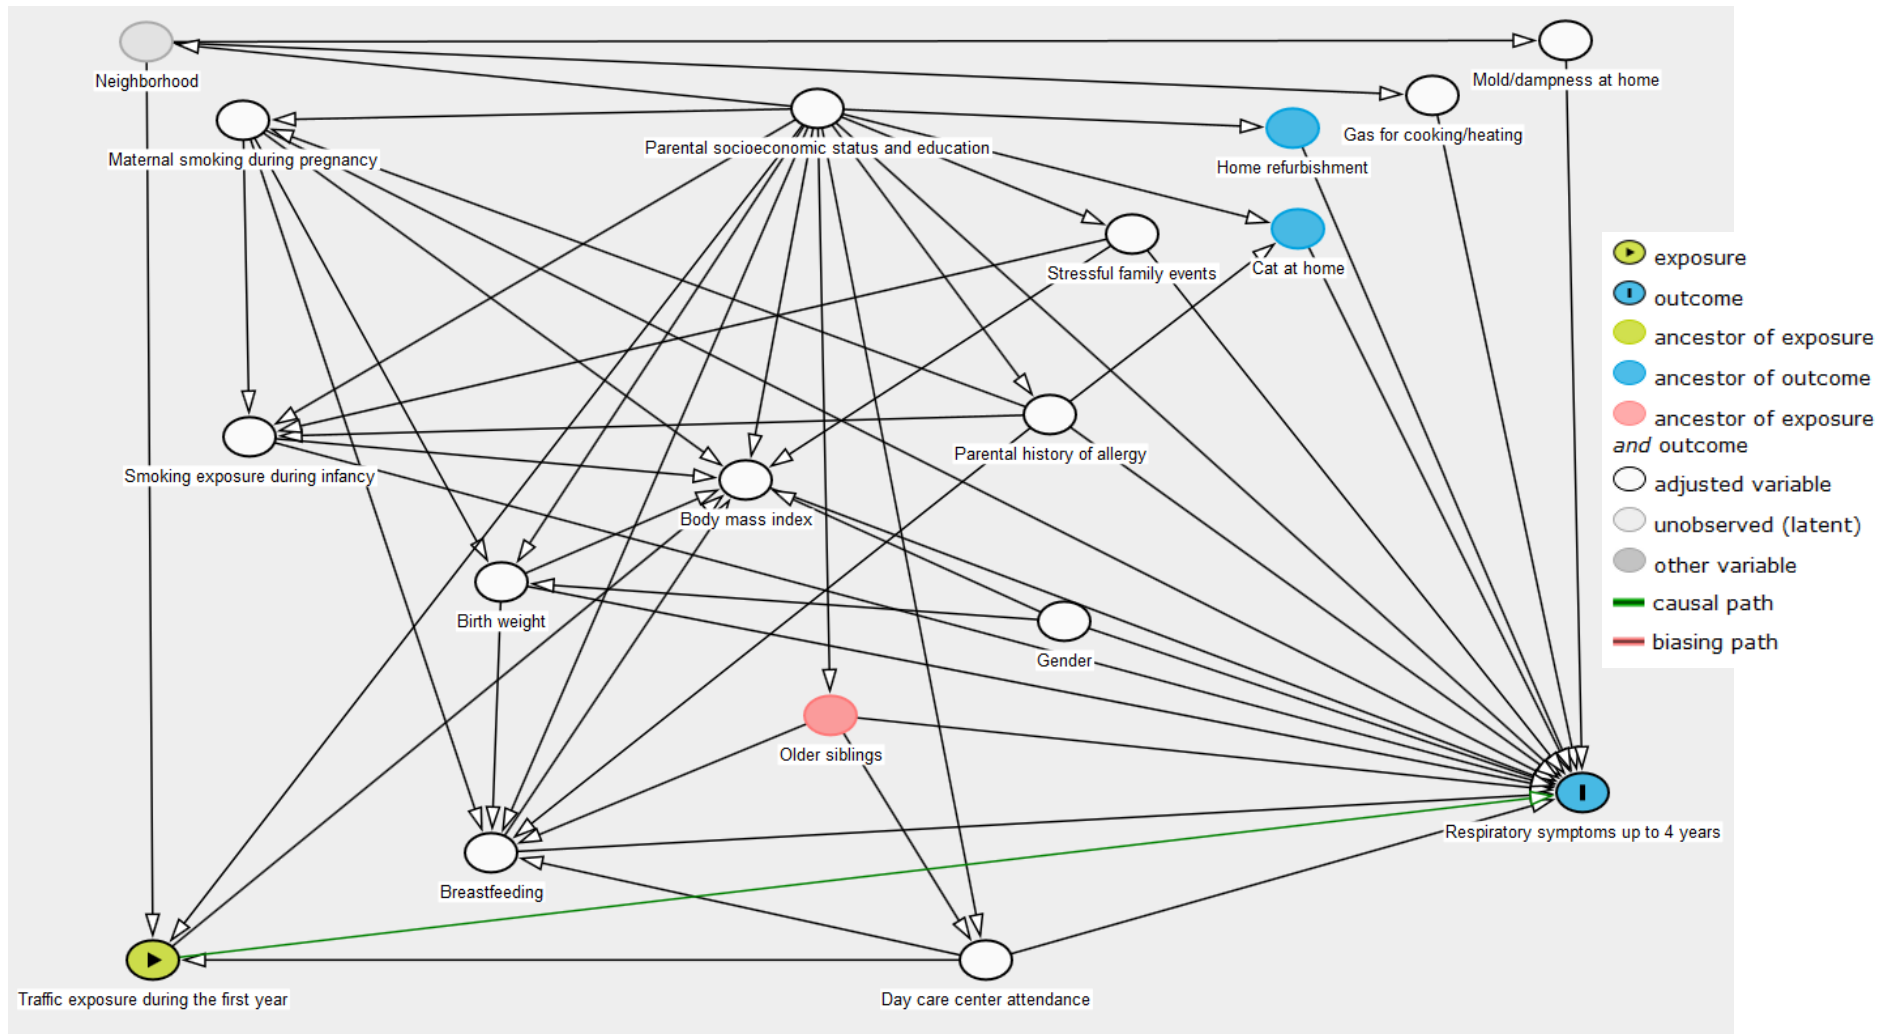

**Figure S1:** Directed acyclic graph for estimating the direct effect of early traffic-related air pollution exposure on respiratory health up to 4 years.
